# Supplementary material
Source: Springer Nature journal article supplement (https://www.springermedizin.de/resource/supplementary/12968_2011_2570_MOESM9_ESM.pdf/9582252)

A.

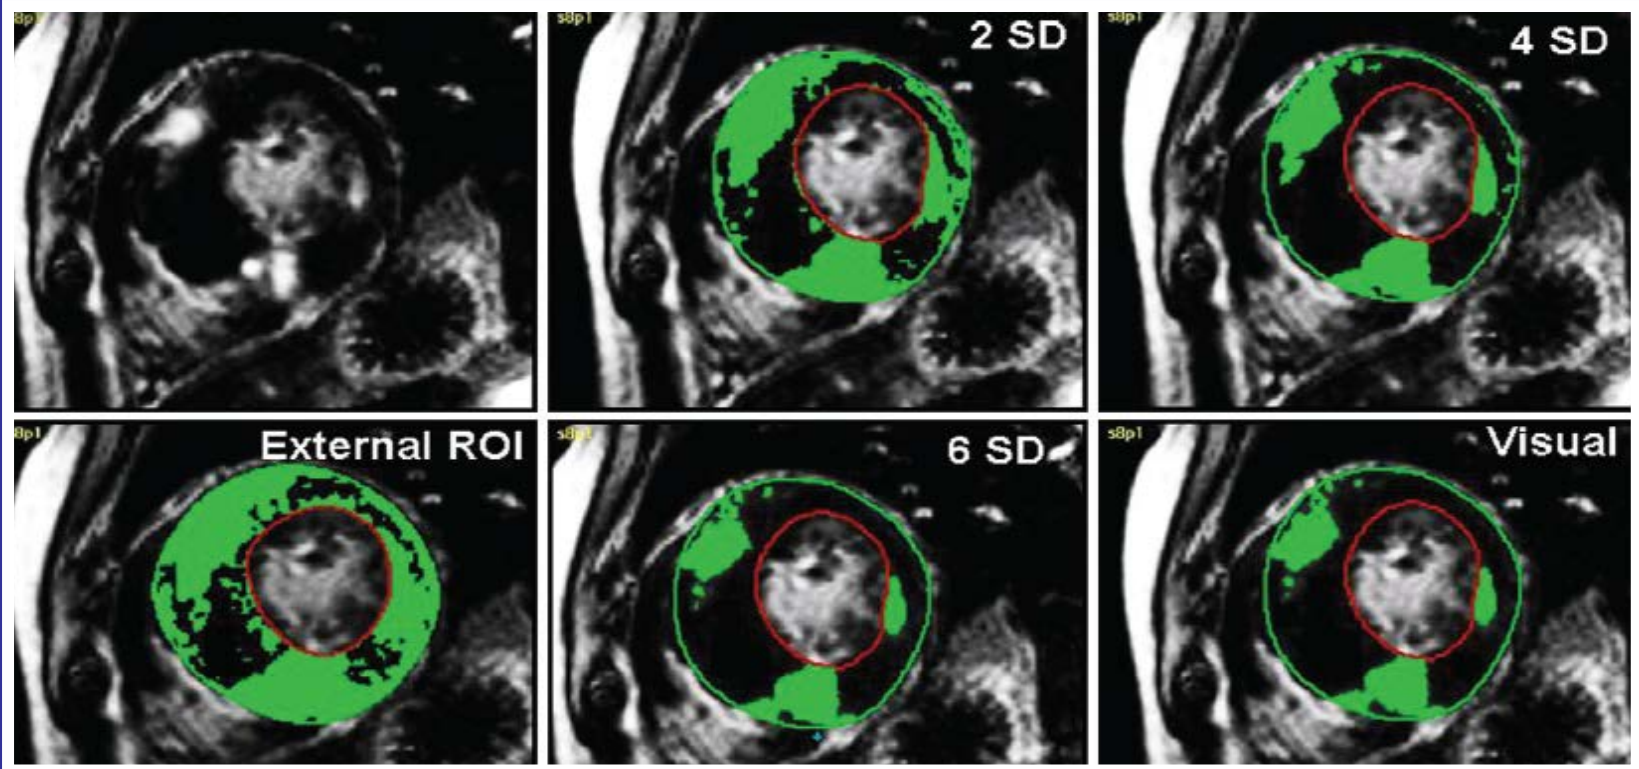

B.

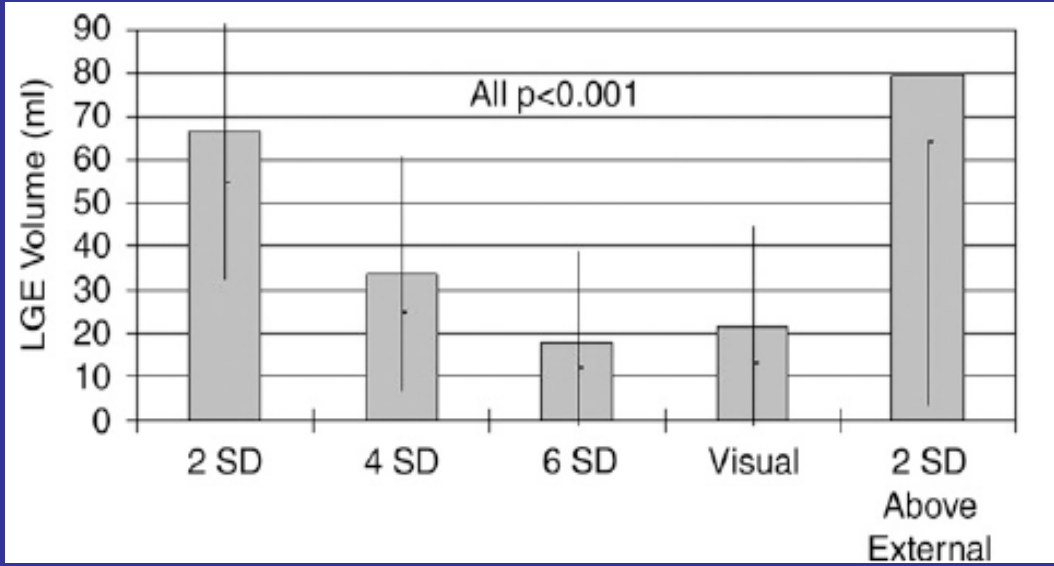

Supplement: MOESM9 [file 9582252]
